# Supplementary material for: Systematic review of the validity and reliability of consumer-wearable activity trackers
Source: PubMed Central journal article supplement (PMC4683756; doi:10.1186/s12966-015-0314-1), 2015-12-18

Additional File 1: Flow of article selection using the PRISMA schematic (Liberati et al., 2009; Moher et al., 2009)

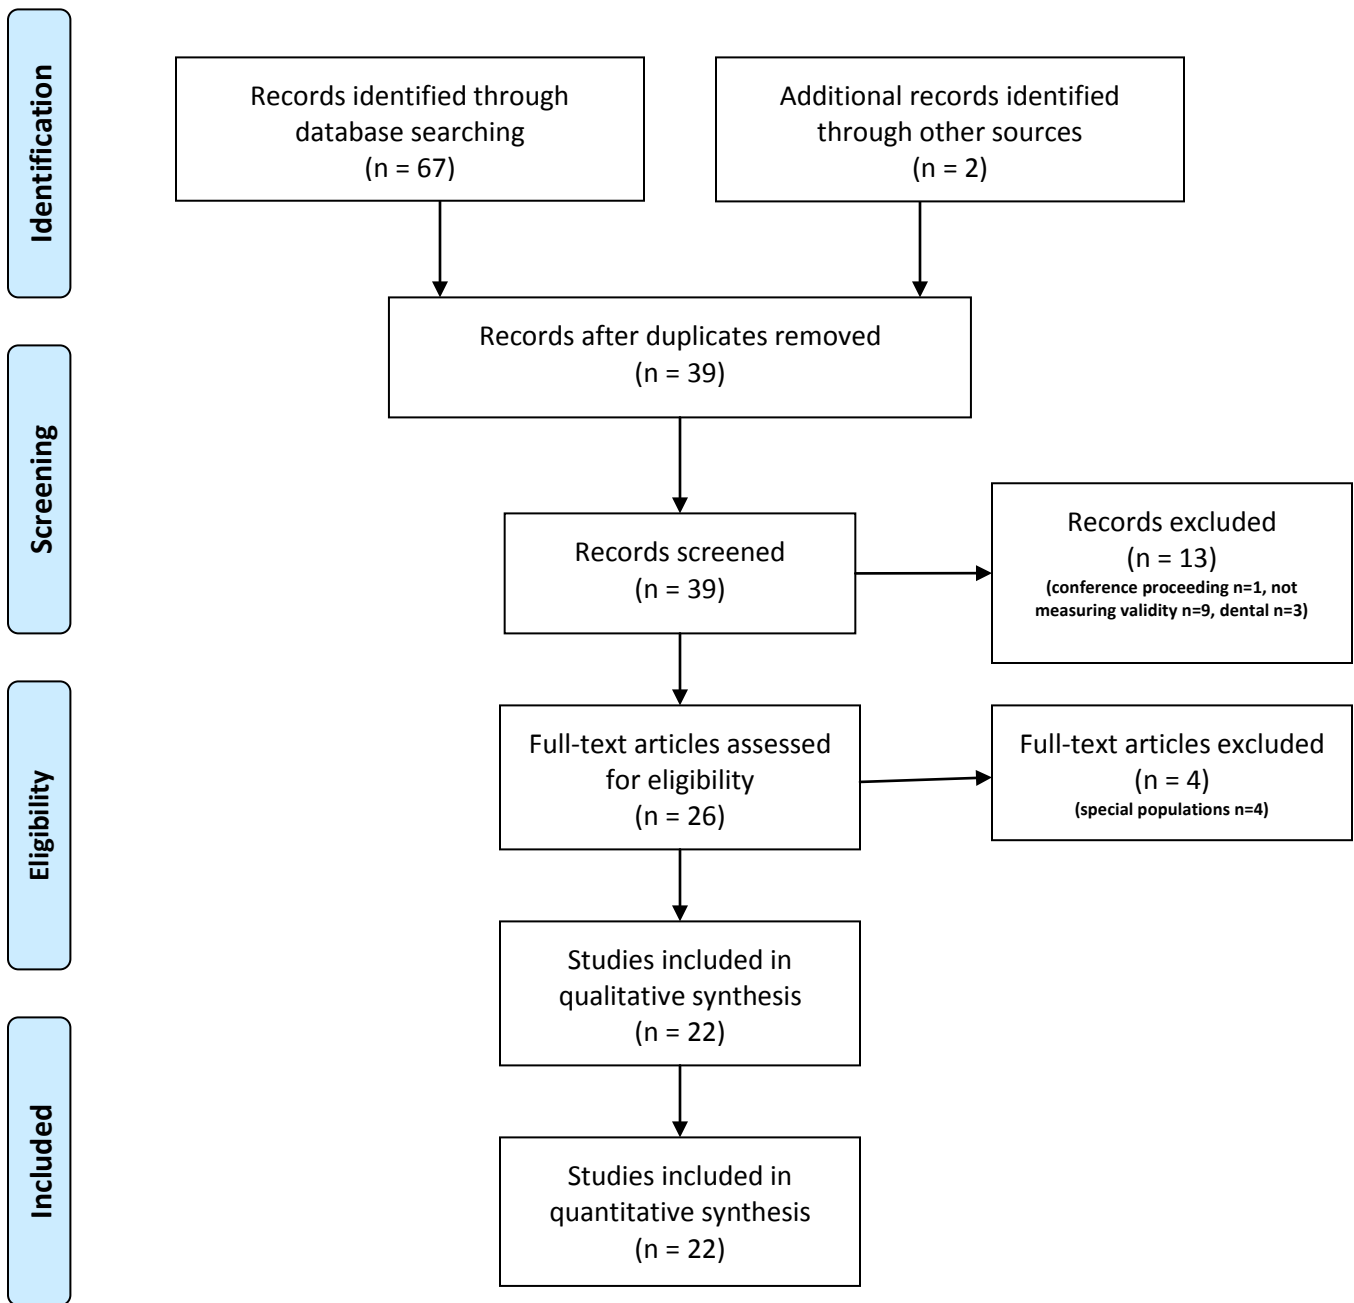

Supplement: 12966_2015_314_MOESM1_ESM.pdf [file 12966_2015_314_MOESM1_ESM.pdf]
